# Supplementary material
Source: PubMed Central journal article supplement (PMC3025665)
Supplement: NIHMS258262-supplement-1_si_001.pdf [file NIHMS258262-supplement-1_si_001.pdf]

## Supporting Information

# A Versatile Method for Functionalizing Surfaces with Bioactive Glycans

*Fang Cheng<sup>†</sup>, Jing Shang<sup>†</sup>, and Daniel M. Ratner\**

Department of Bioengineering, University of Washington, Seattle, Washington 98195

<sup>†</sup>These authors contributed equally to this work

\*To whom correspondence should be addressed. Phone: 206-543-1071, Fax: 206-685-3925, E-mail:

[dratner@u.washington.edu](mailto:dratner@u.washington.edu).

### Table of contents

|                                                                                                                                                                                         |   |
|-----------------------------------------------------------------------------------------------------------------------------------------------------------------------------------------|---|
| Trifluoroethyl derivation of DVS-activated surfaces .....                                                                                                                               | 2 |
| Synthesis of ethylvinyl sulfone mannosides. ....                                                                                                                                        | 2 |
| Comparison of theoretical versus observed XPS composition of modified surfaces (Table S1).....                                                                                          | 3 |
| Model reaction of free mannose with ethylvinyl sulfone (EVS) (Scheme S1). ....                                                                                                          | 4 |
| XPS spectra (a) wide scan and (b) sulfur 2p scan for hydroxyl-terminated alkane thiol (SAMs), SAMs treated with buffer (buffer alone), and DVS-modified surface (DVS) (Figure S1) ..... | 5 |
| XPS (a) wide survey scan and (b) F 1s scan for fluorine-derivated SAMs by trifluoroethanol, trifluoroethylamine, and trifluoroethanethiol (Figure S2).....                              | 6 |
| Bioacore SPR sensorgrams for 100-cycle lectin binding-regeneration on a mannose-modified Biacore chip (Figure S3) .....                                                                 | 7 |
| SPR sensorgrams (without background subtraction) of Con A uptake to the inactivated DVS surface without BSA blocking (Figure S4) .....                                                  | 8 |
| <sup>1</sup> H and <sup>13</sup> C NMR of mannose/EVS reaction products (major fraction) (Figure S5) .....                                                                              | 9 |

**Trifluoroethyl derivation of DVS-activated surface.** Trifluoroethyl derivation was carried on in three fluoride reagents bearing hydroxyl, amine, and thiol group respectively. The DVS-modified surfaces on silicon wafer substrates were immersed in aqueous solutions of the trifluoroethyl nucleophile (trifluoroethanol 20% w/v in pH 10 carbonate buffer, trifluoroethanethiol 10mM in pH 7.4 PBS buffer, trifluoroethylamine 10mM in pH 10 carbonate buffer) at ambient temperature for 16 h unless specified. The surfaces were then thoroughly rinsed with ~10 mL water and ~5 mL ethanol, dried under a stream of argon for 1 min and stored in dark at 4°C.

**Synthesis of ethylvinyl sulfone mannosides.** Ethyl vinyl sulfone (0.67 g, 5.5 mmole) was added to mannose (1 g, 5.5 mmole) in 10 mL buffer (0.5 M sodium carbonate, pH 10), and stirred at room temperature for 16 h. The reaction was concentrated by rotary evaporation and a portion of the resulting solid (containing product and buffer salts) was extracted in a minimal volume of methanol and applied to a silica flash column (methanol: dichloromethane = 2:8). The anomeric mixture of product was separated by preparative thin layer chromatography (isopropanol: methanol: water = 8:2:0.5) to isolate the anomers. The separated fractions were analyzed by ESI-MS and were found to have the same mass ( $[M+Na]^+$  m/z 323.2).  $\alpha$ -Anomer  $^1H$  NMR (500 MHz,  $D_2O$ ):  $\delta$  4.83 (d, J = 1.5 Hz, 1H;  $H_1$ ), 4.18-4.14 (m, 1H; -O- $CH_aH_b$ - $CH_2SO_2CH_2CH_3$ ), 3.90-3.83 (m, 3H;  $H_2$ ,  $H_{6a}$ , -O- $CH_aH_b$ - $CH_2SO_2CH_2CH_3$ ), 3.74-3.71 (m, 1H,  $H_5$ ), 3.68-3.62 (m, 2H,  $H_3$ ,  $H_{6b}$ ), 3.58-3.54 (m, 1H,  $H_4$ ), 3.41-3.37 (m, 2H, -O- $CH_aH_b$ - $CH_2SO_2CH_2CH_3$ ), 3.18-3.13 (m, 2H, -O- $CH_aH_b$ - $CH_2SO_2CH_2CH_3$ ), 1.39-1.36 (t, 3H, -O- $CH_aH_b$ - $CH_2SO_2CH_2CH_3$ ).  $^{13}C$  NMR (500 MHz,  $D_2O$ ):  $\delta$  100.56 ( $C_1$ ), 73.76 ( $C_5$ ), 71.21 ( $C_3$ ), 70.48 ( $C_2$ ), 67.01 ( $C_4$ ), 61.48 ( $C_6$ ), 60.88 (-O- $CH_2$ - $CH_2SO_2CH_2CH_3$ ), 51.50 (-O- $CH_2$ - $CH_2SO_2CH_2CH_3$ ), 48.59 (-O- $CH_b$ - $CH_2SO_2CH_2CH_3$ ), 5.21 (-O- $CH_2$ - $CH_2SO_2CH_2CH_3$ ).

**Table S1.** Comparison of theoretical versus observed XPS composition of modified surfaces.

|   | SAM<br>(11-mercaptoundecanol) |          | DVS-modified SAM |          | Mannose-functionalized<br>SAM via DVS |          |
|---|-------------------------------|----------|------------------|----------|---------------------------------------|----------|
|   | Theoretical                   | Observed | Theoretical      | Observed | Theoretical                           | Observed |
| C | 84.6                          | 88.2±0.6 | 75.0             | 84.3±1.2 | 65.6                                  | 84.9±0.7 |
| O | 7.7                           | 8.3±0.6  | 15.0             | 12.0±1.0 | 28.1                                  | 10.7±0.5 |
| S | 7.7                           | 3.5±0.2  | 10.0             | 3.7±0.2  | 6.3                                   | 4.4±0.2  |

- a. DVS/hydroxyl reaction yield is assumed to be 100%;
- b. The sequential mannose coupling yield is assumed to be 100%;
- c. XPS values represent the averages and standard deviations from at least three spots on two replicates or more.

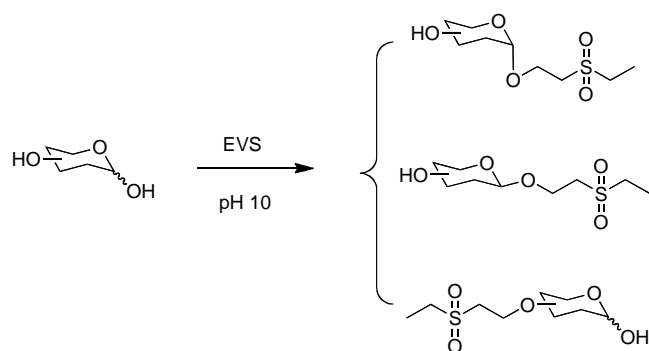

**Scheme S1.** Model reaction of free mannose with ethylvinyl sulfone (EVS).

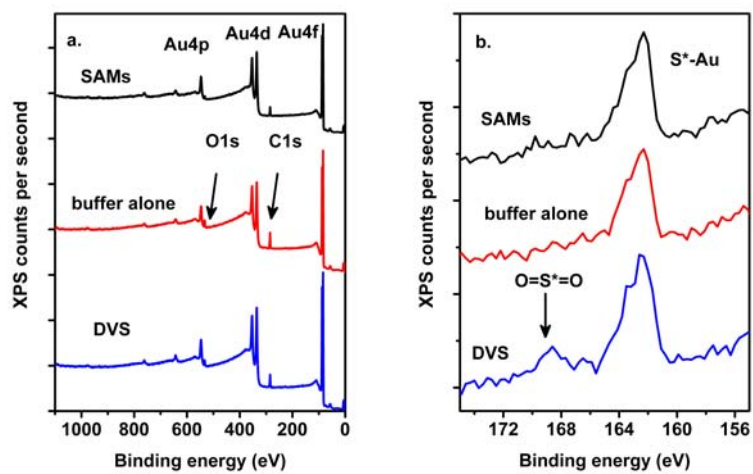

**Figure S1.** XPS spectra (a) wide scan and (b) sulfur 2p scan for hydroxyl-terminated alkane thiol (SAMs), control SAMs treated with buffer (buffer alone), and DVS-modified surface (DVS). The sulfur species at high binding energy (168 eV for oxidized sulfur) (1, 2) indicates that DVS is conjugated to the SAM.

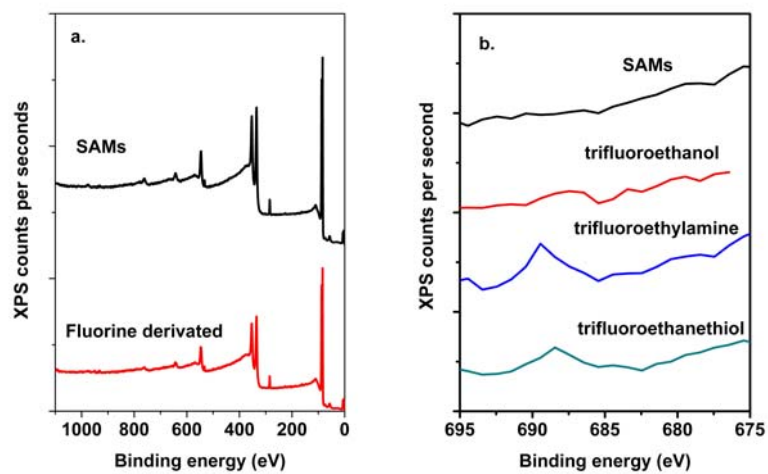

**Figure S2.** XPS (a) wide survey scan and (b) F 1s scan for fluorine-derivated SAMs by trifluoroethanol, trifluoroethylamine, and trifluoroethanethiol.

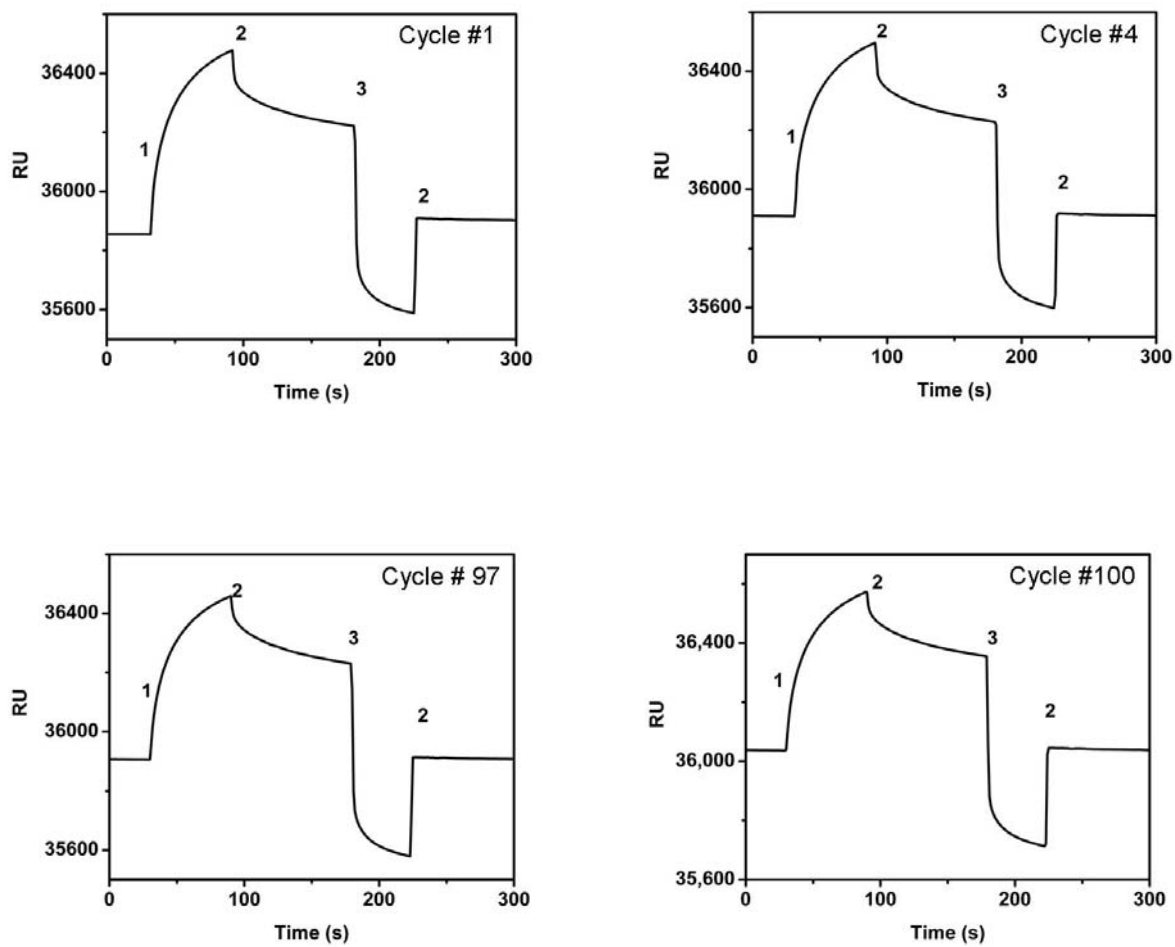

**Figure S3.** Glycan modified surfaces conjugated via DVS chemistries are highly stable to multiple rounds of protein capture and regeneration. Bioacore SPR sensorgrams for 100-cycle lectin binding-regeneration on a mannose-modified Biacore chip. (1) 500 nM ConA, (2) HEPES buffer, and (3) Glycine (10mM, pH 2) for surface regeneration.

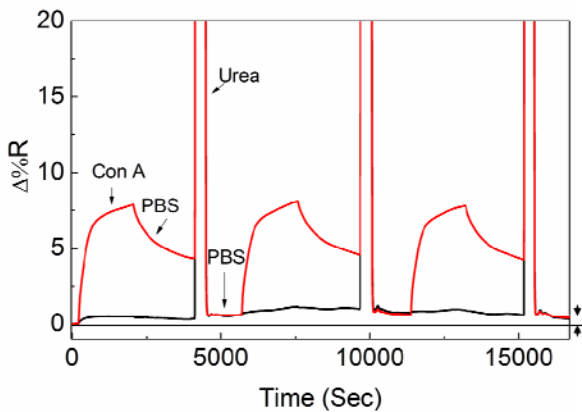

**Figure S4.** SPR sensorgrams (without background subtraction) of Con A binding to an OEG-SH inactivated DVS surface without blocking by BSA. — Mannose, — Background (non-glycan functionalized region). During the first Con A binding cycle, the baseline rose  $\sim 0.5 \Delta\%R$  (indicated by the arrows), which is attributed to Con A nonspecific uptake to the inactivated DVS surface. However, the baseline returned to the initial level in the second and third cycle of Con A binding. These results indicate that there is some nonspecific Con A uptake to the inactivated DVS surface, but after the first binding cycle, only the specific Con A binding is observed on the SPR sensorgram.



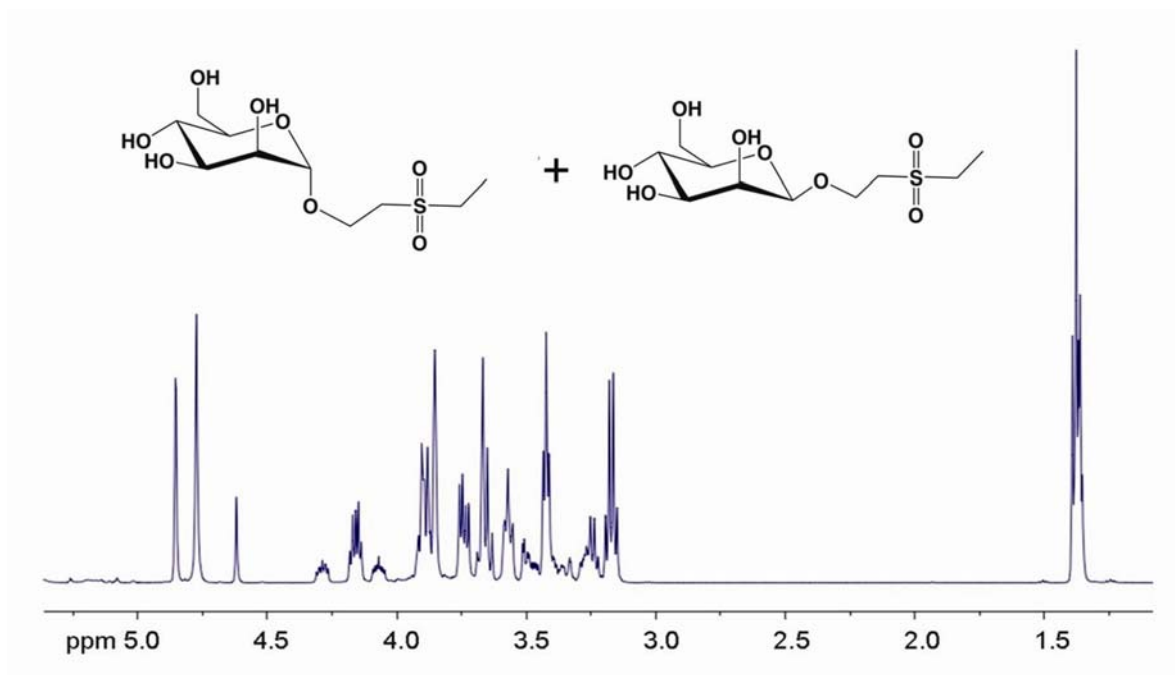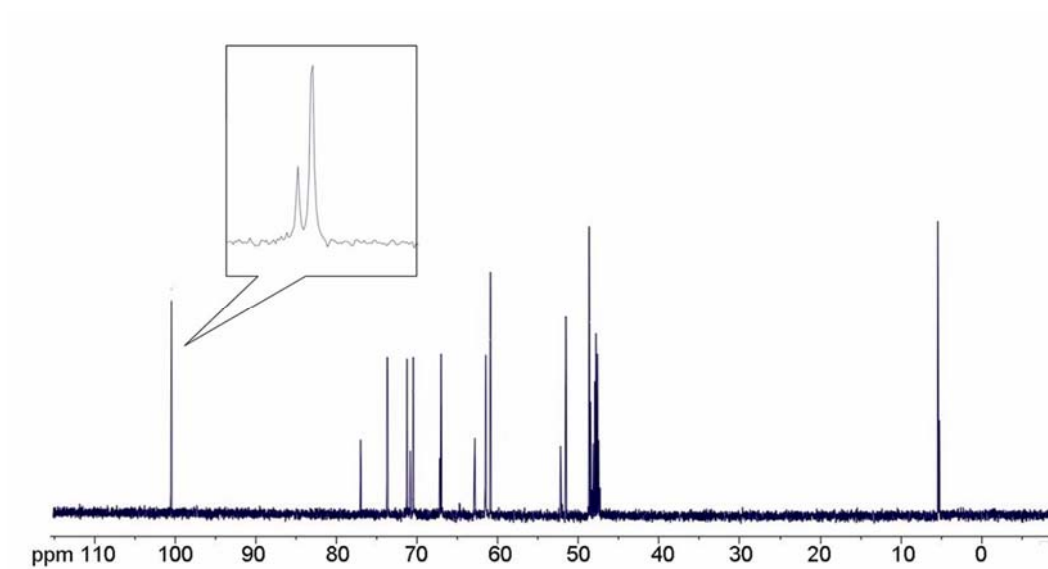

**Figure S5.**  $^1\text{H}$  and  $^{13}\text{C}$  NMR of mannose/EVS reaction products (major fraction), indicating the conjugate contains a (3:1  $\alpha$ : $\beta$ ) mixture of the alpha and beta anomer.

Reference:

- (1) Castner, D., Hinds, K., and Grainger, D. (1996) X-ray photoelectron spectroscopy sulfur 2p study of organic thiol and disulfide binding interactions with gold surfaces. *Langmuir* 12, 5083-5086.
- (2) Cheng, F., Gamble, L. J., Grainger, D. W., and Castner, D. G. (2007) X-ray photoelectron spectroscopy, time-of-flight secondary ion mass spectrometry, and principal component analysis of the hydrolysis, regeneration, and reactivity of N-hydroxysuccinimide-containing organic thin films. *Anal. Chem.* 79, 8781-8.
